# Supplementary material for: Topological behaviour of ternary non-symmorphic crystals KZnX (X = P, As, Sb) under pressure and strain: a first principles study
Source: Royal Society of Chemistry journal article supplement (doi:10.1039/c7cp08121a), 2018-01-01
Supplement: c7cp08121a1.pdf [file c7cp08121a1.pdf]

# Topological behaviour of ternary non-symmorphic crystals $KZnX$ ( $X = P, As, Sb$ ) under pressure and strain : A first principles study

T. Atahar Parveen,<sup>\*,†</sup> E. Narsimha Rao,<sup>†</sup> B. Adivaiah,<sup>†</sup> P. Anees,<sup>‡</sup> and G.  
Vaitheeswaran<sup>\*,†</sup>

*Advanced Center of Research in High Energy Materials (ACRHEM), University of  
Hyderabad, Prof. C. R. Rao Road, Gachibowli, Hyderabad-500 046, Telangana, India, and  
Materials Physics Division, Indira Gandhi Centre for Atomic Research, Kalpakkam,  
603102, India*

E-mail: ataharparveen@gmail.com; vaithee@uohyd.ac.in

---

\*To whom correspondence should be addressed

<sup>†</sup>Advanced Center of Research in High Energy Materials (ACRHEM), University of Hyderabad, Prof. C. R. Rao Road, Gachibowli, Hyderabad-500 046, Telangana, India

<sup>‡</sup>Materials Physics Division, Indira Gandhi Centre for Atomic Research, Kalpakkam, 603102, India

**Table 1: Bond distances of KSbZn at ambient conditions compared with experimental results**

| Compound | Bonds | This work (Å) | Exp.(Å)           |
|----------|-------|---------------|-------------------|
| KZnP     | K-K   | 4.10          | 4.09 <sup>1</sup> |
|          | K-P   | 3.55          | 3.46 <sup>1</sup> |
|          | K- Zn | 3.55          | 3.46 <sup>1</sup> |
|          | P-Zn  | 2.36          | 2.36 <sup>1</sup> |
| KZnAs    | K-K   | 4.27          | 4.22 <sup>2</sup> |
|          | K-As  | 3.69          | 3.53 <sup>2</sup> |
|          | K-As  | 3.69          | 3.53 <sup>2</sup> |
|          | As-Zn | 2.46          | 2.43 <sup>2</sup> |
| KZnSb    | K-K   | 4.59          | 4.54 <sup>1</sup> |
|          | K-Sb  | 3.76          | 3.71 <sup>1</sup> |
|          | K-Zn  | 3.76          | 3.71 <sup>1</sup> |
|          | Sb-Zn | 2.65          | 2.62 <sup>1</sup> |

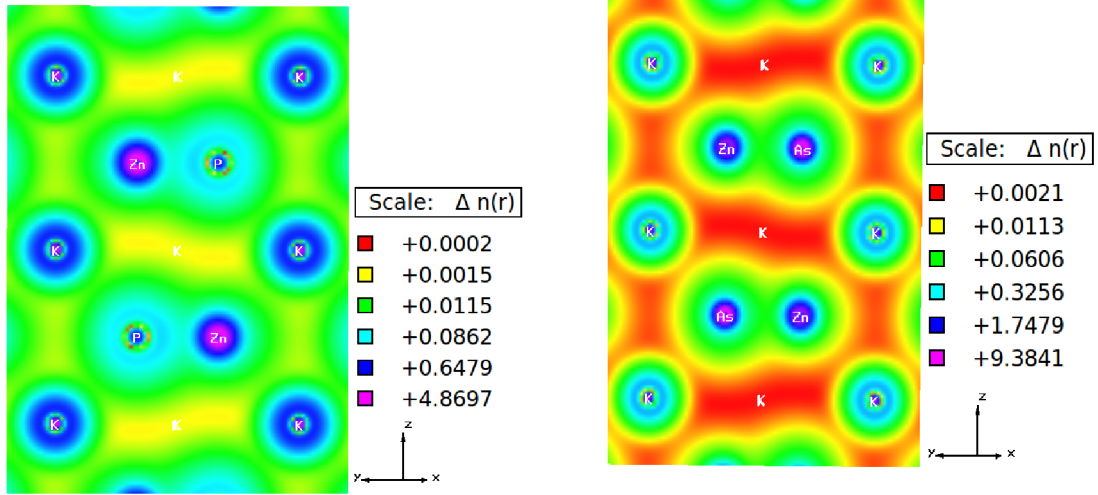

(a)

(b)

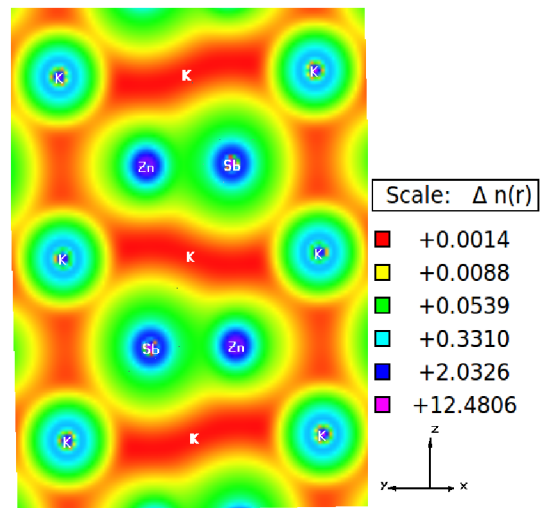

(c)

Figure 1: (Color online) Contour plot of charge density plots for (a) KZnP (b) KZnAs (c) KZnSb crystals.

## References

- (1) Gerhard Savelsberg and Herbert Schfer, *Z. Naturforsch.* 33B, 370-373 (1978)
- (2) Rainer Vogel and Hans-Uwe Schuster, *Z. Naturforsch.* 85B, 114-116 (1980)
